# Supplementary material
Source: publisher figshare collection journal article supplement (https://brill.figshare.com/articles/dataset/_/26983534)
Supplement: Supplementary file 1 [file 1]

RESEARCH ARTICLE

**Effects of powderization of a granular diet on growth  
performance of the edible cricket, *Teleogryllus occipitalis*  
(Orthoptera: Gryllidae)**

*K. Murata*<sup>1</sup>, *W. Kagesawa*<sup>2</sup>, *M. Akechi*<sup>2</sup>, *Y. Morimitsu*<sup>2</sup> and *T. Suzuki*<sup>1\*</sup>

<sup>1</sup>Graduate School of Bio-Applications and Systems Engineering, Tokyo University of  
Agriculture and Technology, Nakacho 2-24-16, Koganei, Tokyo 184-8588, Japan;

<sup>2</sup>Department of Nutrition and Food Science, Ochanomizu University, Otsuka 2-1-1, Bunkyo,  
Tokyo 112-8610, Japan; \*tszk@cc.tuat.ac.jp

**Supplementary material**
