# Supplementary material
Source: publisher figshare collection journal article supplement (https://brill.figshare.com/articles/dataset/_/26983534)
Supplement: Supplementary file 1 [file 1]

## Sheet: Sheet3
TABLE S3 Results of correlation analysis with the fresh body mass of adults (g) in the powdered diet
Parameter	Method	n	r	P
Head width (mm)	Pearsona	59	0.85	0.001
Pronotum length (mm)	Pearson	59	0.56	<0.001
Pronotum width (mm)	Pearson	59	0.70	<0.001
Forewing length (mm)	Pearson	58	0.63	<0.001
Hind-leg femur length (mm)	Pearson	59	0.72	<0.001
Developmental time (day)	Spearmanb	59	−0.34	<0.001
a Pearson correlation coefficient. b Spearman’s rank correlation coefficient.
